# Supplementary material for: Association of Circulating Tumor Cells, Megakaryocytes and a High Immune-Inflammatory Environment in Metastatic Breast Cancer
Source: MDPI journal article supplement (doi:10.3390/cancers15133397), 2023-06-28
Supplement: s1 [file s1]

**Table S1.** Clinical data of patients at diagnosis

| Variable                        |                                                   | Number (%) |
|---------------------------------|---------------------------------------------------|------------|
| All patients                    |                                                   | 59 (100)   |
| Age at cancer diagnosis (years) |                                                   |            |
| Median (SEM), range             | 50.3 (1.61), 24.8-81.8                            |            |
| Histology                       | Invasive ductal carcinoma                         | 48 (81.3)  |
|                                 | Invasive lobular carcinoma                        | 6 (10.2)   |
|                                 | Another invasive carcinoma                        | 4 (6.8)    |
|                                 | Ductal carcinoma in situ                          | 1 (1.7)    |
| Grade                           | Grade 1                                           | 3 (5.1)    |
|                                 | Grade 2                                           | 17 (28.8)  |
|                                 | Grade 3                                           | 36 (61.0)  |
|                                 | Unknown grade                                     | 3 (5.1)    |
| Subtype                         | Luminal-like                                      | 37 (62.7)  |
|                                 | HER2-positive                                     | 12 (20.3)  |
|                                 | Triple negative                                   | 10 (17.0)  |
| Tumor stage                     | T1 ( $\leq 20$ mm)                                | 11 (18.7)  |
|                                 | T2 ( $> 20$ mm in $\leq 50$ mm)                   | 32 (54.2)  |
|                                 | T3 ( $> 50$ mm)                                   | 16 (27.1)  |
| Nodal stage                     | pN0                                               | 11 (18.7)  |
|                                 | pN1 (1-3 positive nodes)                          | 16 (27.1)  |
|                                 | pN2 (4-6 positive nodes)                          | 6 (10.2)   |
|                                 | pN3 ( $>6$ positive nodes)                        | 15 (25.4)  |
|                                 | No pathological stage                             | 11 (18.7)  |
| M stage                         | M0                                                | 46 (78.0)  |
|                                 | M1 (primary metastatic)                           | 13 (22.0)  |
| Surgery                         | Mastectomy and axillary dissection                | 24 (40.7)  |
|                                 | Mastectomy and SNB                                | 4 (6.8)    |
|                                 | Breast conserving surgery and axillary dissection | 10 (16.9)  |
|                                 | Breast conserving surgery and SNB                 | 7 (11.9)   |
|                                 | Hygienic breast ablation                          | 1 (1.7)    |
|                                 | No surgery performed                              | 13 (22.0)  |
| Adjuvant treatment              | (Neo)adjuvant chemotherapy                        | 34 (57.6)  |
|                                 | Adjuvant radiation therapy                        | 39 (66.1)  |
|                                 | Adjuvant endocrine therapy                        | 32 (64.2)  |

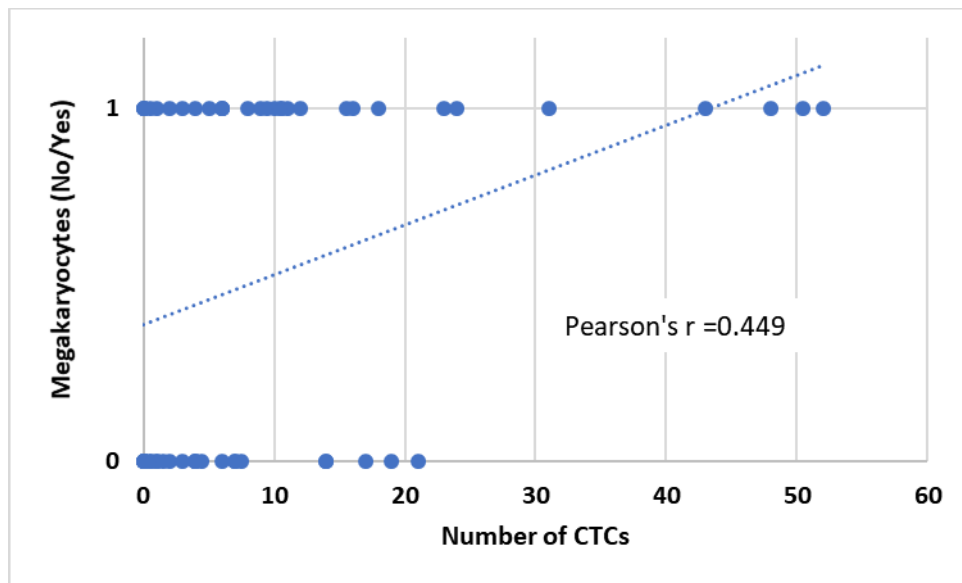

**Figure S1.** Correlation between the number of megakaryocytes and the number of circulating tumor cells (CTCs)

**A**

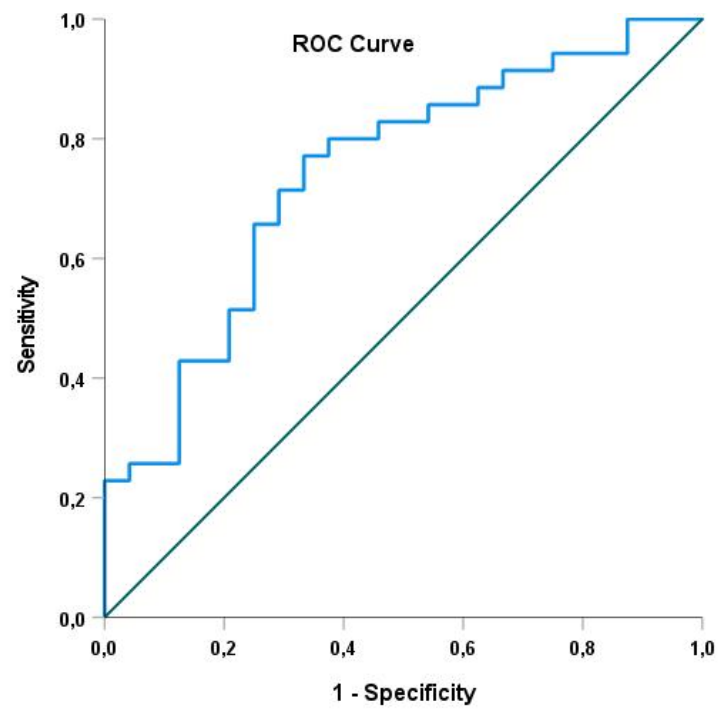

**B**

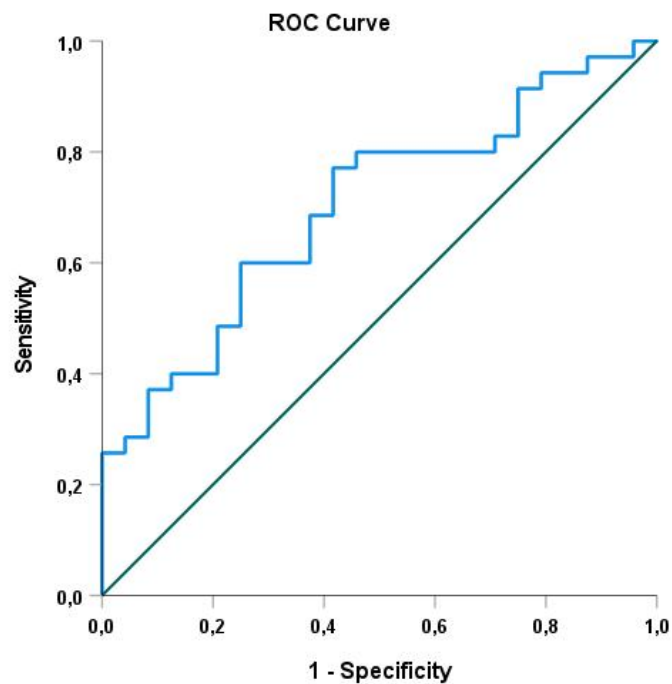

**Figure S2.** ROC curves ) **(A)** for pan-inflammation value (PIV) and **(A)** systemic immune-inflammation index (SII).

The optimal cutoff value between the 'low' and 'high' PIV values was set at 368 and between 'low' and 'high' SII values at  $840 \times 10^9$

**Table S2.** Comparison of clinical and blood-based characteristics between groups with high and low systemic immune-inflammation index.

| Variable                               | Low SII (<840) | High SII (≥840) | All       | P-value      |
|----------------------------------------|----------------|-----------------|-----------|--------------|
| <b>Subtype</b>                         |                |                 |           |              |
| Luminal A/B                            | 19 (51.4)      | 18 (48.6)       | 37 (62.7) | 0.815        |
| HER2 positive                          | 6 (50.0)       | 6 (50.0)        | 12 (20.3) |              |
| Triple negative                        | 4 (40.0)       | 6 (50.0)        | 10 (16.9) |              |
| <b>Type of therapy</b>                 |                |                 |           |              |
| Endocrine                              | 12 (63.2)      | 7 (36.8)        | 19 (32.8) | 0.113        |
| Chemotherapy                           | 16 (41.0)      | 23 (59.0)       | 39 (67.2) |              |
| <b>Line of therapy</b>                 |                |                 |           |              |
| 1 <sup>st</sup> -2 <sup>nd</sup> line  | 15 (57.7)      | 11 (42.3)       | 26 (49.1) | 0.408        |
| 3 <sup>rd</sup> -4 <sup>th</sup> line  | 9 (47.4)       | 10 (52.6)       | 19 (32.2) |              |
| ≥5 <sup>th</sup> line                  | 5 (35.7)       | 9 (64.3)        | 14 (23.7) |              |
| <b>Cycle of therapy</b>                |                |                 |           |              |
| 1 <sup>th</sup> -2 <sup>nd</sup> cycle | 9 (37.5)       | 15 (62.5)       | 24 (40.7) | 0.138        |
| ≥3 <sup>rd</sup> cycle                 | 20 (57.1)      | 15 (42.9)       | 35 (59.3) |              |
| <b>Skeletal metastases</b>             |                |                 |           |              |
| No                                     | 6 (28.6)       | 15 (71.4)       | 21 (36.2) | <b>0.019</b> |
| Yes                                    | 23 (79.3)      | 14 (37.8)       | 37 (63.8) |              |
| <b>Liver metastases</b>                |                |                 |           |              |
| No                                     | 15 (60.0)      | 10 (40.0)       | 25 (42.4) | 0.153        |
| Yes                                    | 14 (41.2)      | 20 (58.8)       | 34 (57.6) |              |
| <b>CTC clusters</b>                    |                |                 |           |              |
| No                                     | 26 (48.1)      | 28 (51.9)       | 54 (91.5) | 0.612        |
| Yes                                    | 3 (60.0)       | 2 (20)          | 5 (8.5)   |              |
| <b>Megakaryocytes</b>                  |                |                 |           |              |
| No                                     | 15 (63.6)      | 13 (46.4)       | 28 (47.5) | 0.519        |
| Yes                                    | 14 (45.2)      | 17 (54.8)       | 31 (52.5) |              |
| <b>CTC group</b>                       |                |                 |           |              |
| 0 CTC                                  | 4 (33.3)       | 8 (66.7)        | 12 (20.3) | 0.468        |
| 1-4 CTC                                | 11 (52.4)      | 10 (47.6)       | 21 (35.6) |              |
| ≥5 CTC                                 | 14 (53.8)      | 12 (46.2)       | 26 (44.1) |              |

SII: Systemic immune-inflammation index (SII), CTCs: Circulating tumor cells.
